# Supplementary material for: Polyimide/crown ether composite film with low dielectric constant and low dielectric loss for high signal transmission
Source: Royal Society of Chemistry journal article supplement (doi:10.1039/d2ra07043j), 2023-01-01
Supplement: d2ra07043j1.pdf [file d2ra07043j1.pdf]

## Supporting Information

### **Polyimide/Crown Ether Composite Film with Low Dielectric Constant and Low Dielectric Loss for High Signal Transmission**

Heming Li<sup>a</sup>, Xinming Wang<sup>a</sup>, Yuze Gong<sup>ab</sup>, Hongbin Zhao<sup>ac</sup>, Zhaobin Liu<sup>c</sup>, Lin Tao<sup>a</sup>, Youyou Peng<sup>d</sup>,  
Ke Ma<sup>a\*</sup>, Zhizhi Hu<sup>ac\*</sup>, and Davoud Dastan<sup>e\*</sup>

<sup>a</sup>School of Chemical Engineering, University of Science and Technology Liaoning, Anshan 114051, China

<sup>b</sup>Sinochem Lantian Fluoro Materials Co., Ltd.

<sup>c</sup>Oxiranchem Holding Group Co. Ltd, Liaoyang 111003, China

<sup>d</sup>Montverde Future Academy Shanghai, 88 Jianhao Road, Pudong New District, Shanghai, 201318, China

<sup>e</sup>Department of Materials Science and Engineering, Cornell University, Ithaca, NY 14850, USA

\*Corresponding Authors: E-mail addresses: mkustl@163.com (Ke Ma); zzhustl@163.com (Zhizhi Hu); d.dastan61@yahoo.com (Davoud Dastan)

## Appendix

Figure S1. <sup>1</sup>H NMR spectrum of diamine monomer

### BNPP

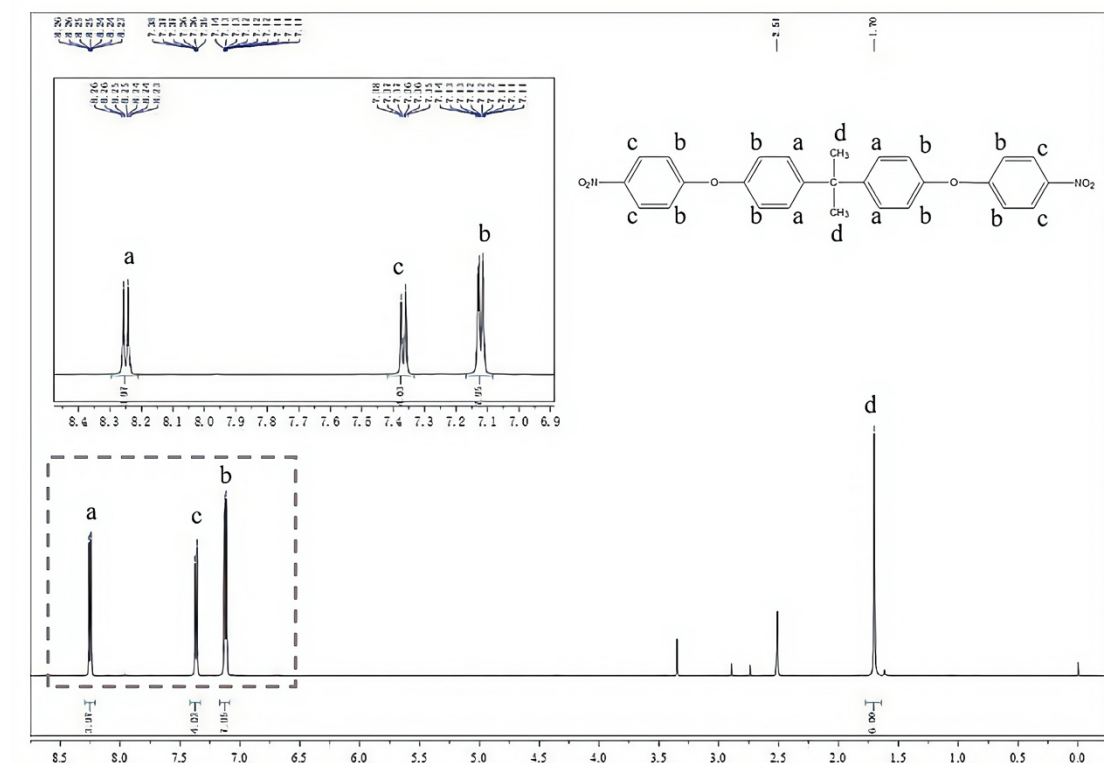

# BAPP

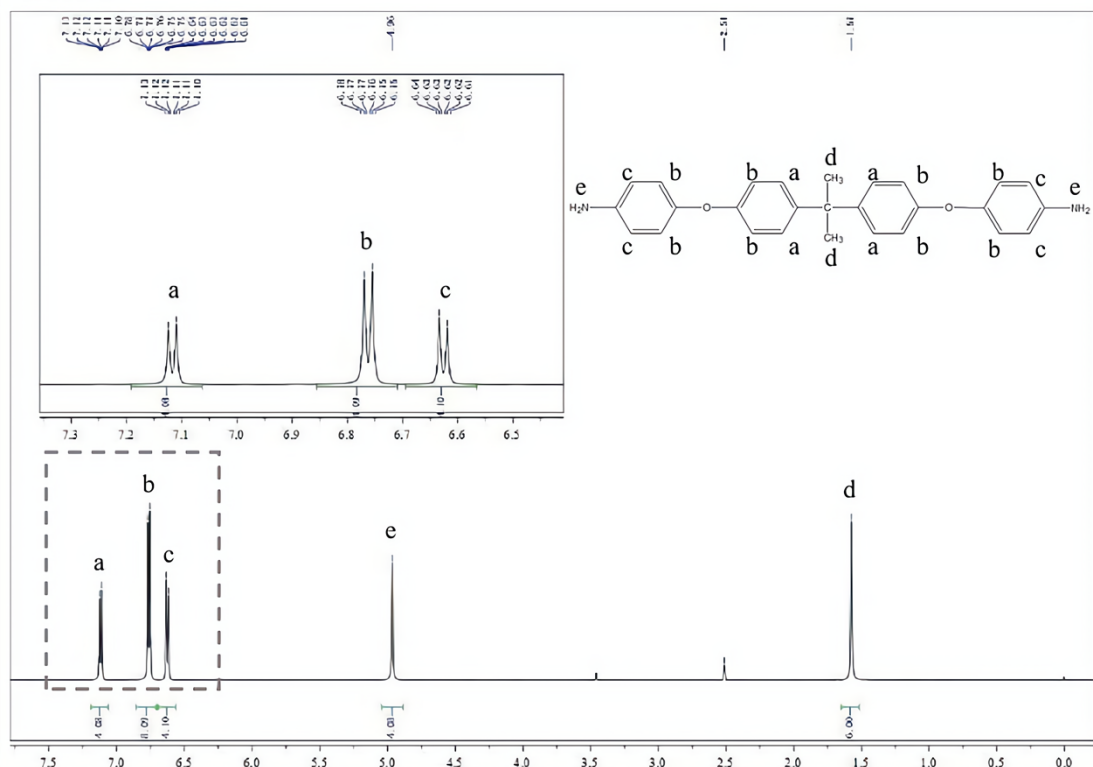

# BNPP-2ME

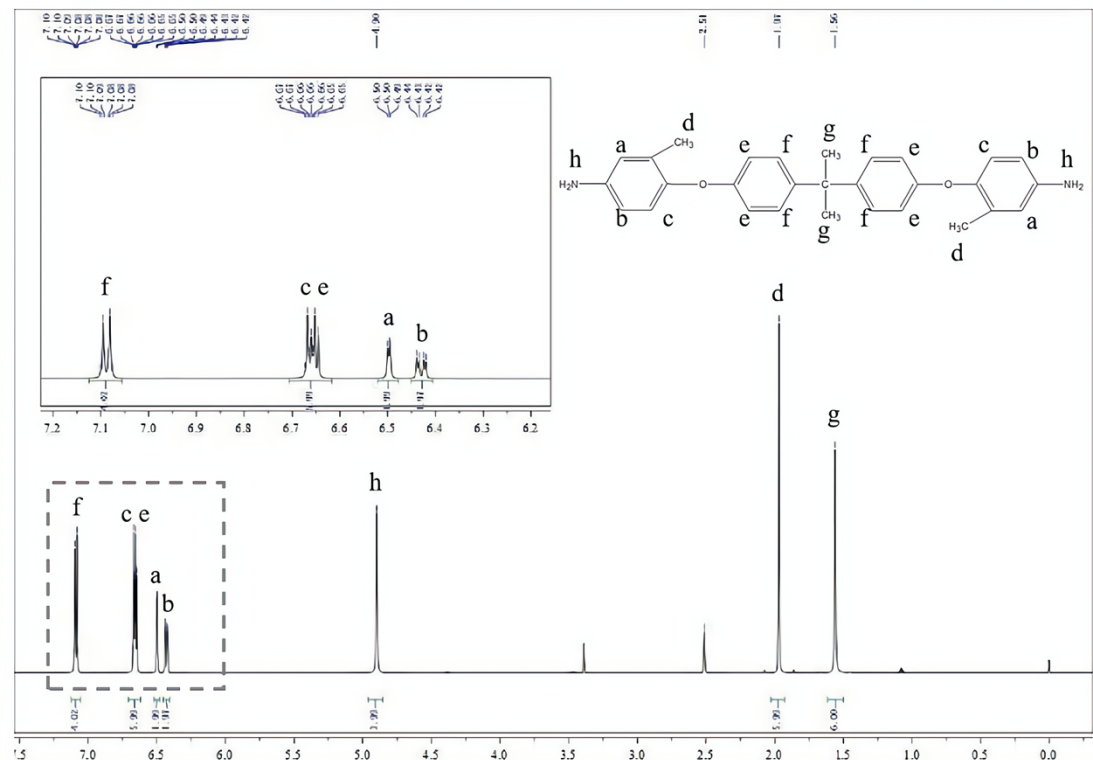

# BAPP-2ME

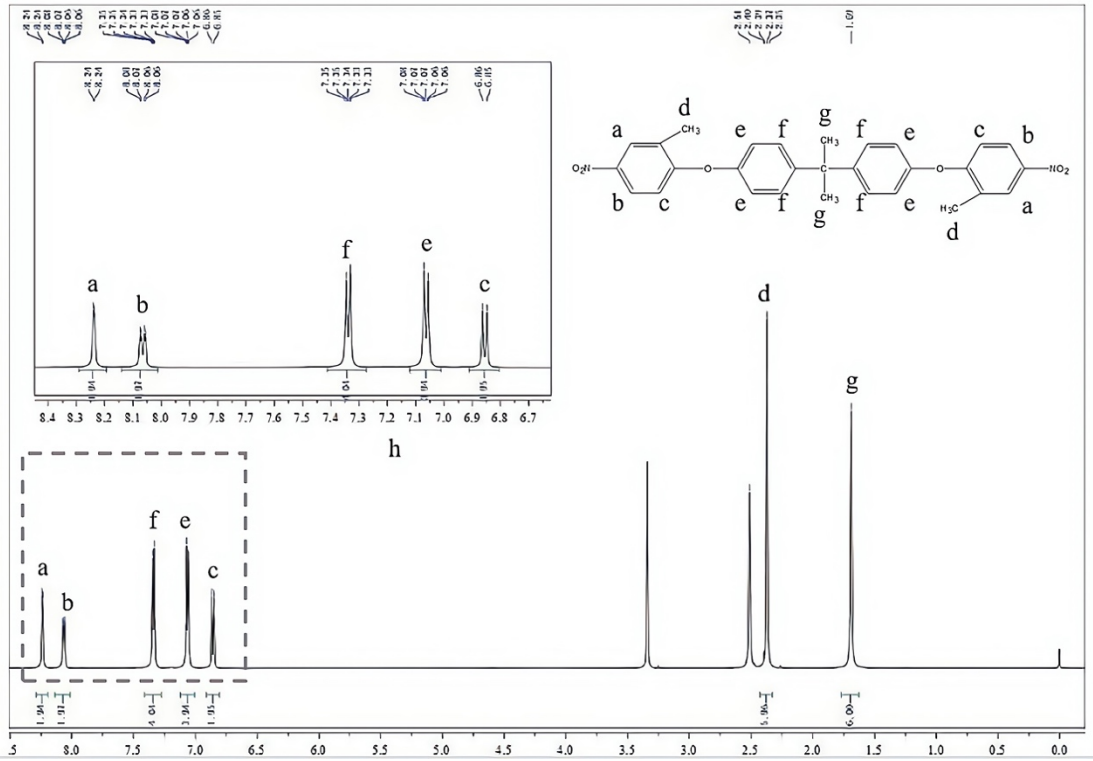

# BNPP-2TF

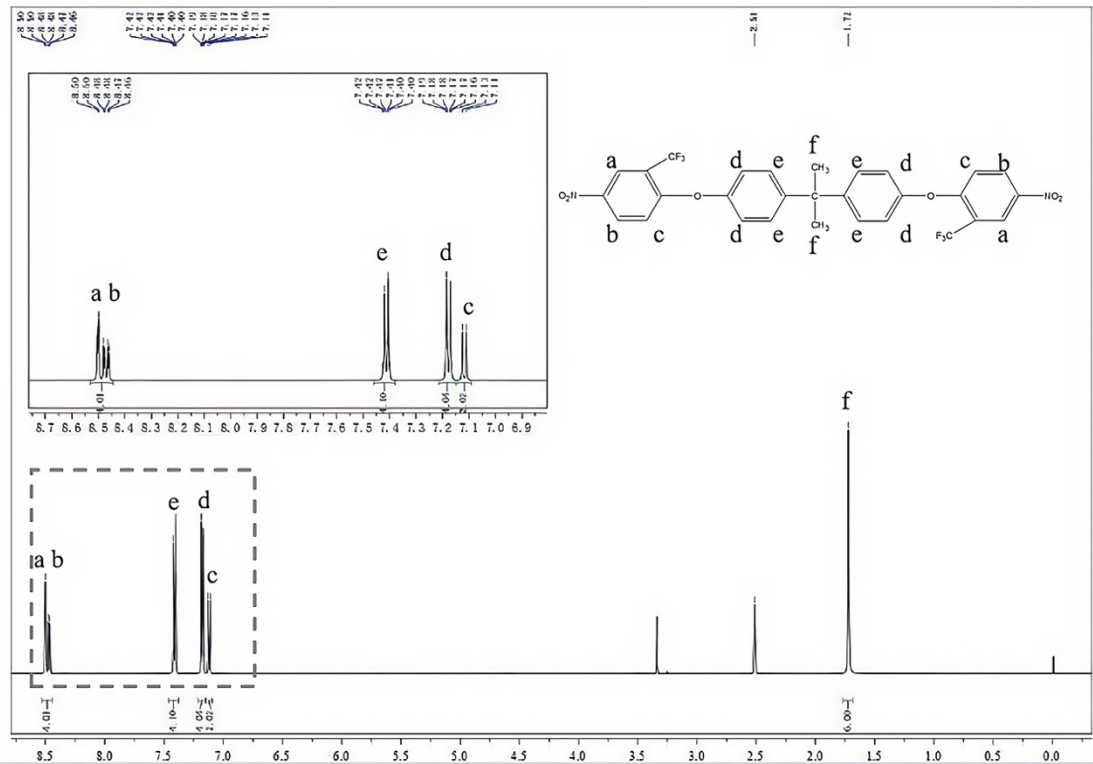

# BAPP-2TF

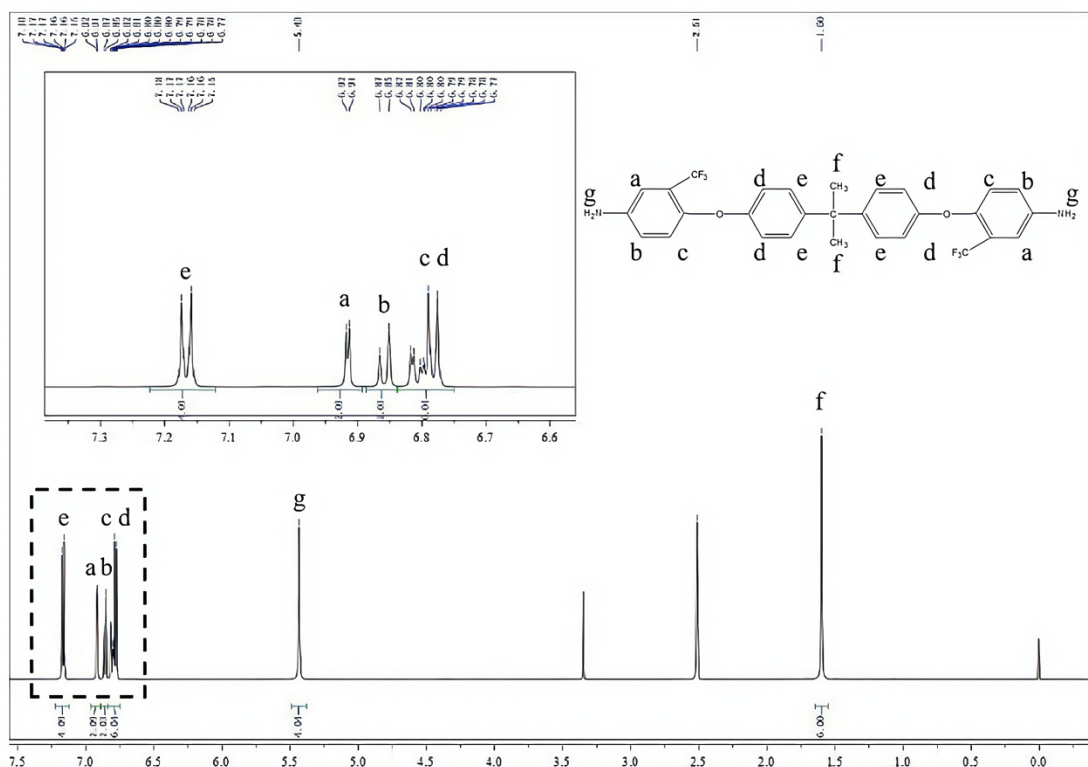

Figure S1.†
